# Supplementary material
Source: Springer Nature journal article supplement (http://www.springermedizin.de/resource/supplementary/13054_2009_8416_MOESM2_ESM.pdf/9731912)
Supplement: MOESM2 [file 9731912]

| RR 20      |                     |        |   | RR 40, Ventilation increased |                     |        |              | RR 60, Ventilation increased |                     |        |              |        |   |
|------------|---------------------|--------|---|------------------------------|---------------------|--------|--------------|------------------------------|---------------------|--------|--------------|--------|---|
| 30 min     | M                   | 30 min | M | 40 min                       | M                   | 30 min | M            | 30 min                       | M                   | 40 min | M            | 30 min | M |
| NONE,<br>a | Circuit<br>Flush, b |        |   | NONE,<br>c                   | Circuit<br>Flush, d |        | ASPIDS,<br>e | NONE,<br>f                   | Circuit<br>Flush, g |        | ASPIDS,<br>h |        |   |
